# Supplementary material for: A renewable biopolymer cathode with multivalent metal ions for enhanced charge storage
Source: Royal Society of Chemistry journal article supplement (doi:10.1039/c3ta13876c), 2013-10-30
Supplement: c3ta13876c.pdf [file c3ta13876c.pdf]

## Supplementary Information

### Figures

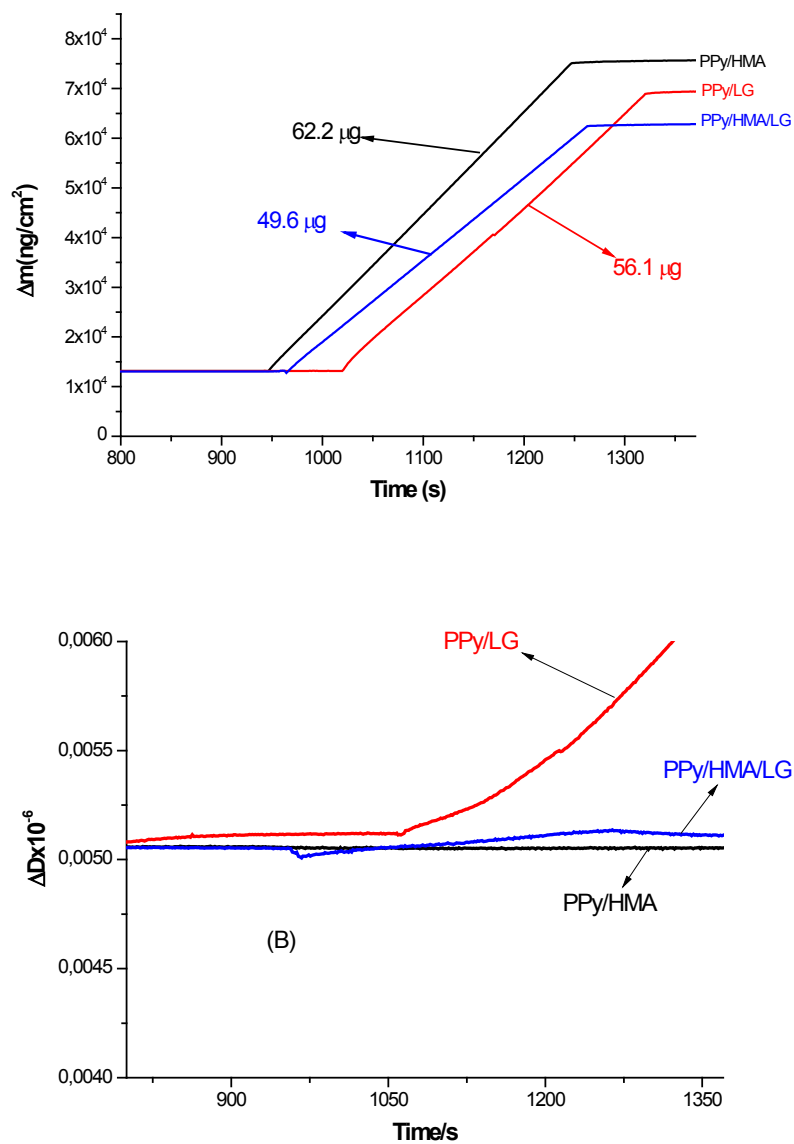

Figure S1. Mass changes (A) and dissipation curves (B) obtained for the binary and ternary systems.

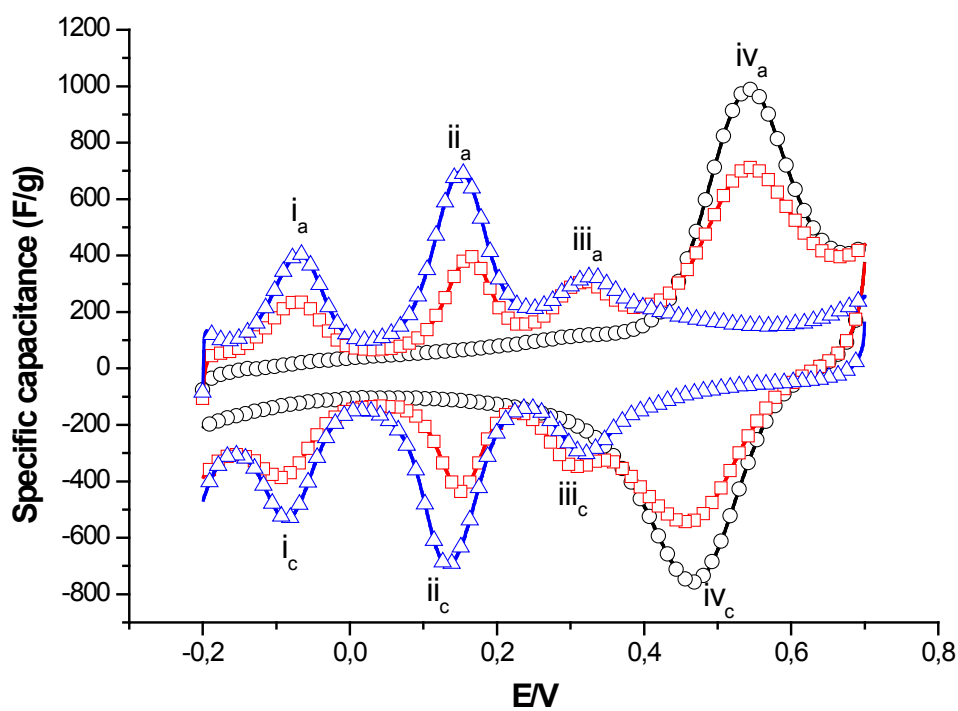

Figure S2. Specific capacitances of (O) PPy/LG, ( $\Delta$ ) PPy/HMA) and ( $\square$ ) PPy/HMA/LG on gold electrode in 0.1 M HClO<sub>4</sub> at a scan rate of 20 mV/s.

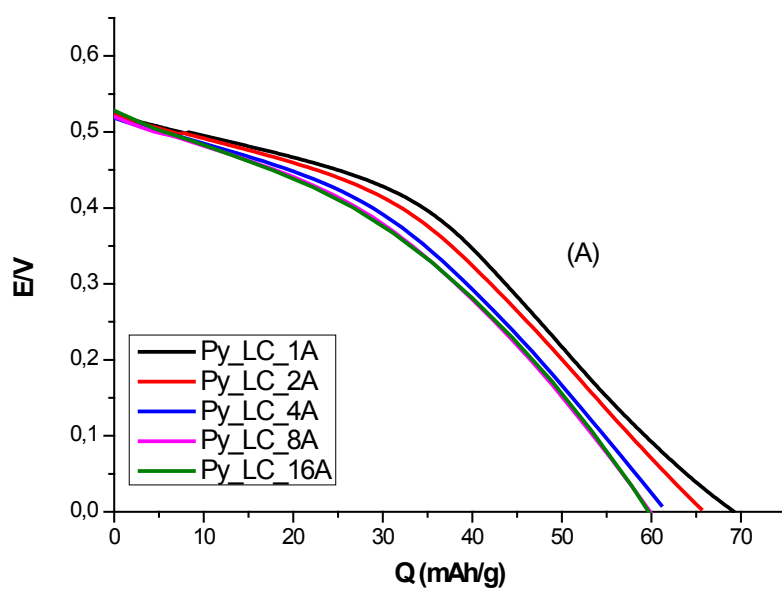

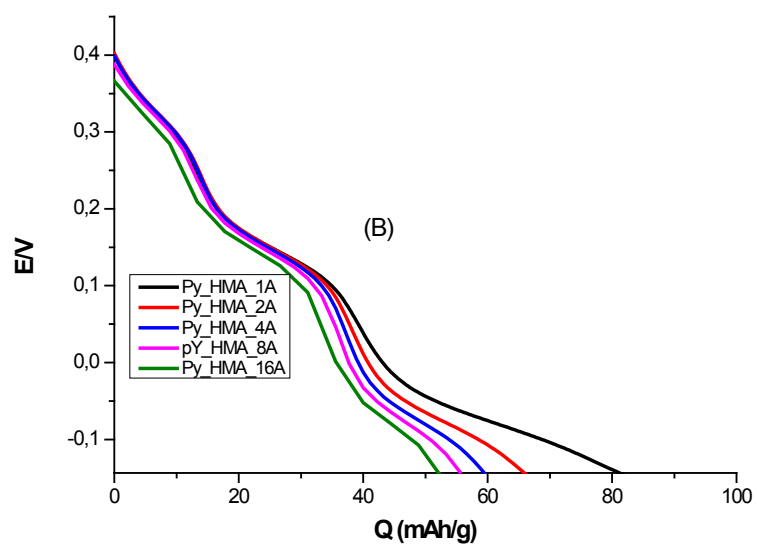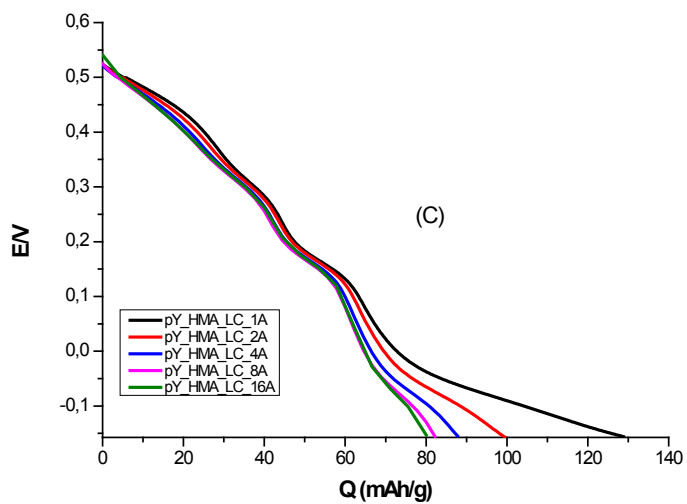

Figure S3. Discharge curves (A) PPY/LG, (B) PPY/HMA and (C) PPY/HMA/LG at different currents.

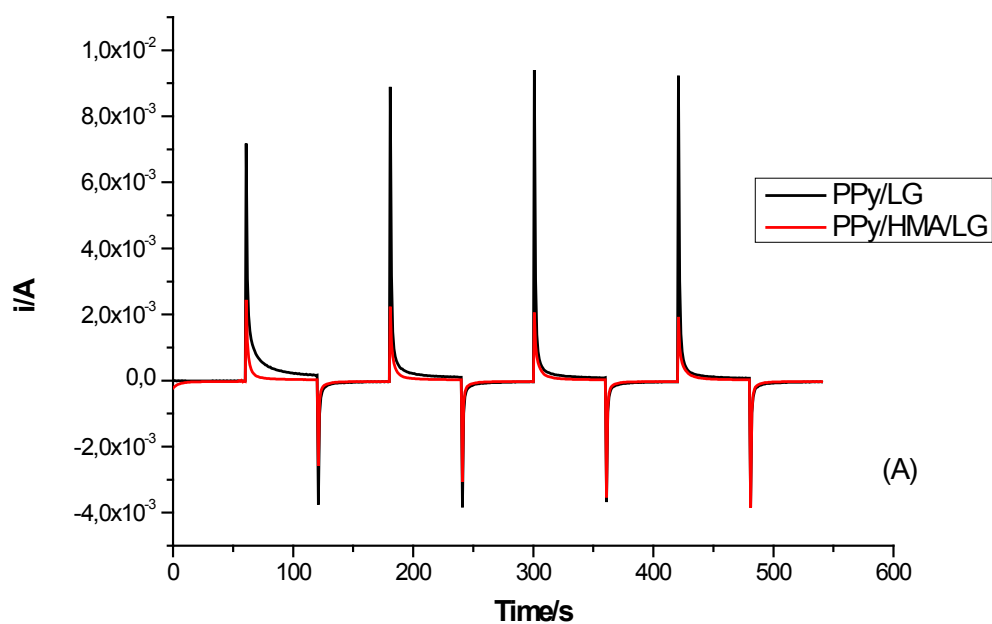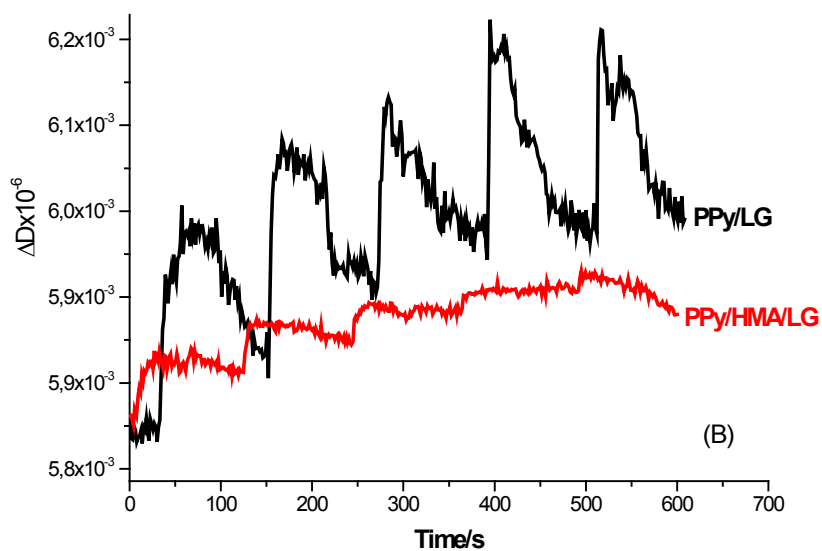

Figure S4. Changes in dissipation and the corresponding chronoamperograms for PPy/LG and PPy/HMA/LG as the potential is switched between 0.0 and 0.7 V.

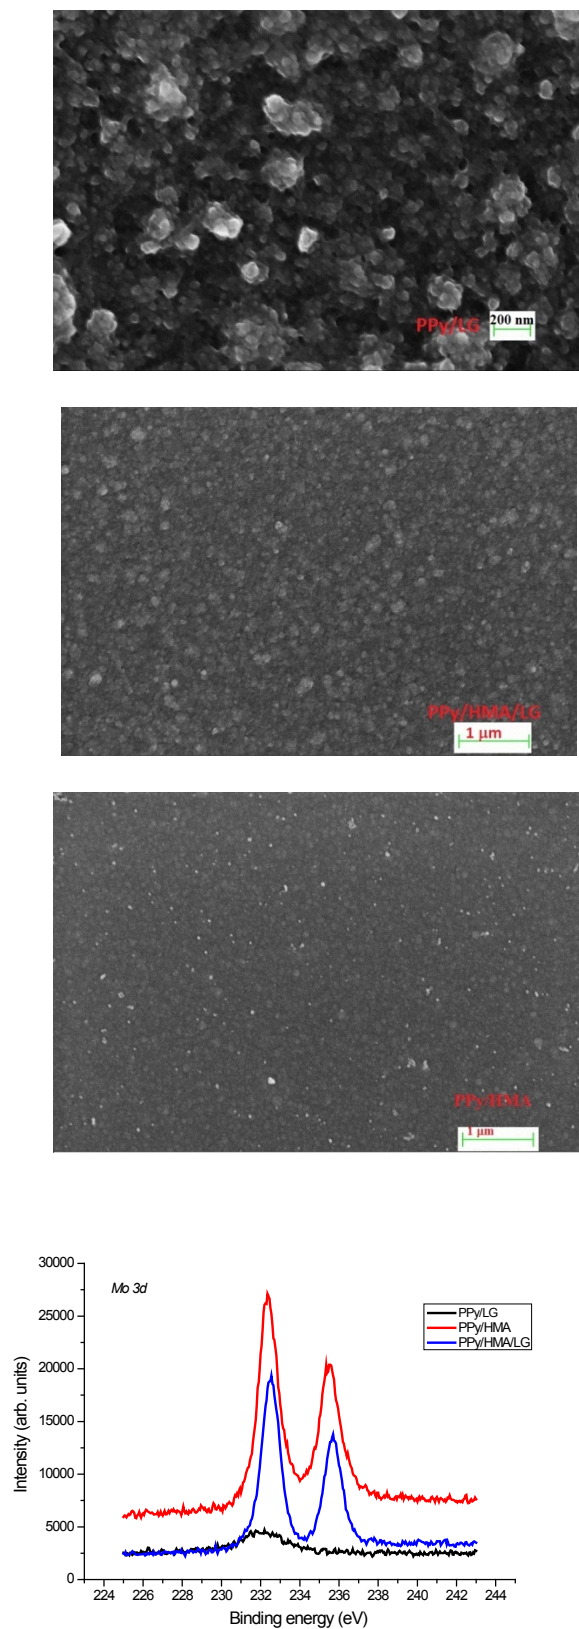

Figure S5. Scanning Electron Microscopy images and X-ray Photoelectron Spectra of the binary and ternary systems investigated.

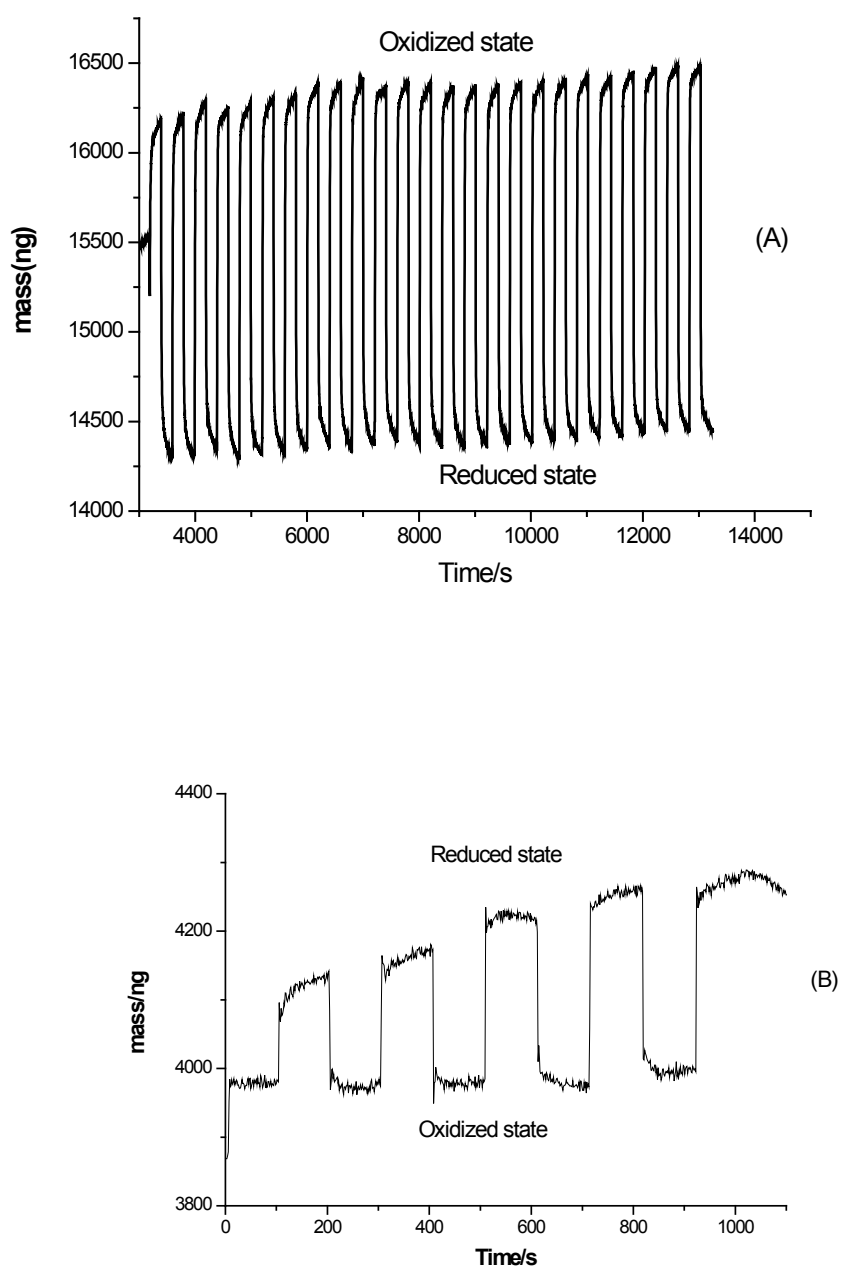

Figure S6. Massograms for (A) PPy doped with  $\text{ClO}_4^-$  and (B) PPy doped with HMA.

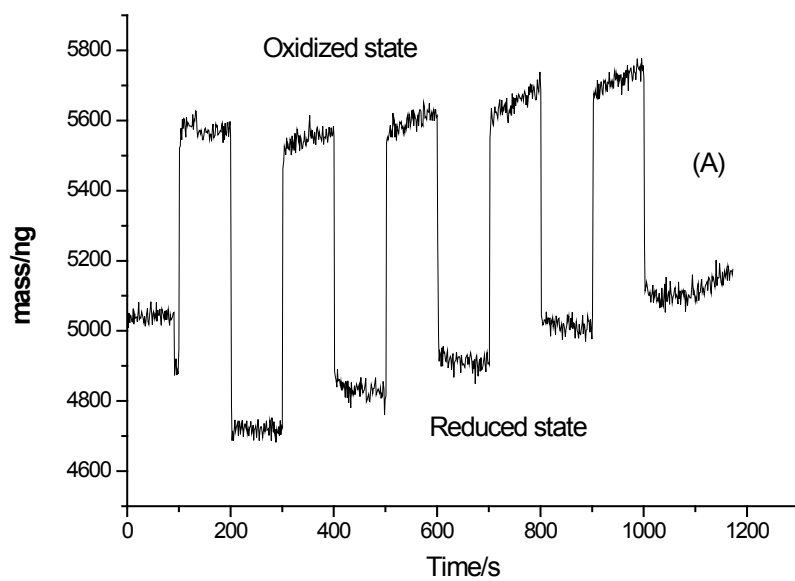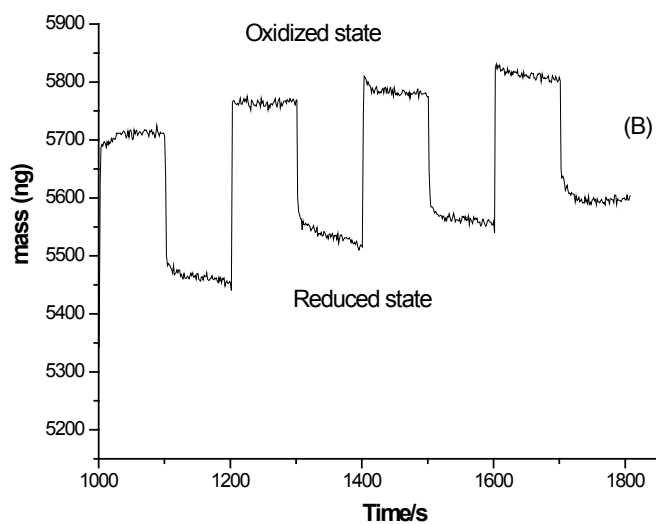

Figure S7. Massograms for (A) PPy doped with LG and (B) PPy doped with HMA/LG.

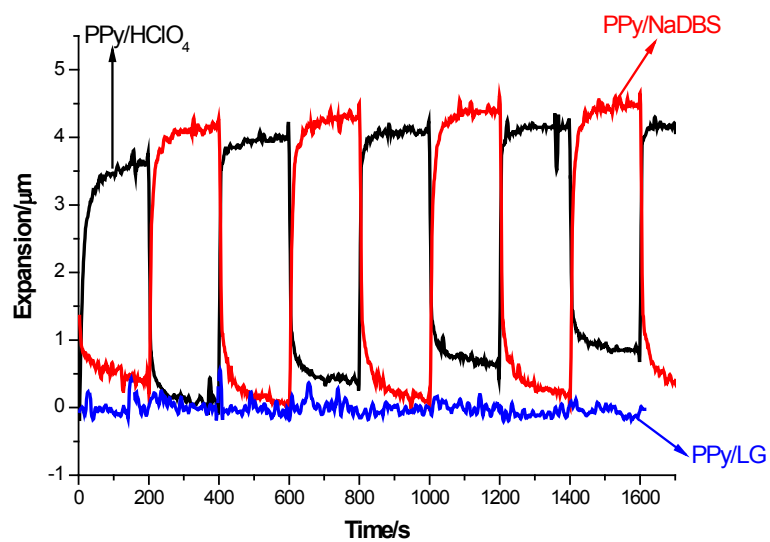

Figure S8. Comparison of the actuation (radial expansion) for PPy/LG, PPy/ClO<sub>4</sub><sup>-</sup> and PPy/NaDBS systems.
